# Supplementary material
Source: MDPI journal article supplement (https://www.mdpi.com/2077-0472/13/5/1090)
Supplement: s1 [file s1]

**Table S7.** Wisteria vein mosaic virus (WVMV) haplotypes identified with DnaSP software, version 6.12.03. WVMV isolates corresponding to each haplotype are identified by their accession number, isolate name, country of origin and plant host. Detailed information on individual isolates can be found in Table S2.

| Haplotype | Accession | Isolate | Country        | Host                         |
|-----------|-----------|---------|----------------|------------------------------|
| Hap_1     | OM417226  | Sar 12  | Italy          | <i>Wisteria sinensis</i>     |
| Hap_2     | OM417222  | Sar 8   | Italy          | <i>Wisteria sinensis</i>     |
| Hap_2     | OM417224  | Sar 10  | Italy          | <i>Wisteria sinensis</i>     |
| Hap_2     | KP161267  | JW_2014 | United Kingdom | <i>Wisteria floribunda</i>   |
| Hap_3     | OM417223  | Sar 9   | Italy          | <i>Wisteria sinensis</i>     |
| Hap_4     | OM417220  | Sar 6   | Italy          | <i>Wisteria sinensis</i>     |
| Hap_5     | DQ009883  | WF03    | Poland         | <i>Wisteria floribunda</i>   |
| Hap_6     | OP748400  | Bari    | Italy          | <i>Wisteria sinensis</i>     |
| Hap_7     | KP161266  | W7_2014 | United Kingdom | <i>Wisteria brachybotrys</i> |
| Hap_8     | OM417221  | Sar 7   | Italy          | <i>Wisteria sinensis</i>     |
| Hap_9     | OM417225  | Sar 11  | Italy          | <i>Wisteria sinensis</i>     |
| Hap_10    | AF484549  | AUS     | Australia      | <i>Wisteria spp.</i>         |
| Hap_10    | EU308593  | Wis 2B  | Netherlands    | <i>Wisteria spp.</i>         |
| Hap_11    | OM417219  | Sar 5   | Italy          | <i>Wisteria sinensis</i>     |
| Hap_12    | AY519365  | BJ      | China          | <i>Wisteria spp.</i>         |
| Hap_12    | AY656816  | Beijing | China          | <i>Wisteria spp.</i>         |
| Hap_13    | MH558668  | ThW2259 | Iran           | <i>Robinia spp. aphids</i>   |
| Hap_14    | MK119780  | YZ      | China          | <i>Wisteria sinensis</i>     |
| Hap_15    | MN514947  | Ir      | Iran           | <i>Wisteria sinensis</i>     |
| Hap_16    | EU308592  | NZL     | New Zealand    | <i>Wisteria sinensis</i>     |
