# Supplementary material
Source: MDPI journal article supplement (https://www.mdpi.com/2077-0472/13/5/1090)
Supplement: s1 [file s1]

**Table S4.** Percent amino acid sequence identities of the partial sequence (116 aa) of the nuclear inclusion protein b (Nlb), between Wisteria vein mosaic virus (WVMV) isolate Bari (UXP87281) and 146 isolates representative of 143 species members of the genus *Potyvirus*. An isolate of ryegrass mosaic virus (RGMV, genus *Rymovirus*) was also included as an outgroup. Sequence identities are calculated based on pairwise MAFFT-based comparison. The analysis was performed using Sequence Demarcation Tool (SDT) software, version 1.2. All sequences are identified by their accession number and species name. Detailed information on individual isolates can be found in Table S1.

| Sequence                                            | Identity % |
|-----------------------------------------------------|------------|
| QLK02401 Wisteria vein mosaic virus                 | 100.00     |
| YP 842358 Wisteria vein mosaic virus                | 97.41      |
| BDS00297 Wisteria vein mosaic virus                 | 96.55      |
| QLG97050 Wisteria vein mosaic virus                 | 96.55      |
| NP 734357 Bean common mosaic necrosis virus         | 93.97      |
| YP 009667127 Paris mosaic necrosis virus            | 93.10      |
| YP 009458616 Saffron latent virus                   | 93.10      |
| YP 004940327 Yambean mosaic virus                   | 92.24      |
| YP 077276 Watermelon mosaic virus                   | 92.24      |
| NP 734199 Soybean mosaic virus                      | 92.24      |
| BBJ70068 Uraria mosaic virus                        | 92.24      |
| YP 010086811 East Asian Passiflora distortion virus | 91.38      |
| YP 007001302 Blue squill virus A                    | 91.38      |
| AZF86246 Passiflora mottle virus                    | 91.38      |
| UOF93077 Passiflora chlorosis virus                 | 91.38      |
| YP 006395360 East Asian Passiflora virus            | 91.38      |
| NP 734387 Cowpea aphidborne mosaic virus            | 90.52      |
| NP 734191 Zucchini yellow mosaic virus              | 88.79      |
| YP 004564597 Hardenbergia mosaic virus              | 88.79      |
| YP 009255234 Impatiens flower break virus           | 88.79      |
| YP 004063679 Passion fruit woodiness virus          | 88.79      |
| YP 001974444 Fritillary virus Y                     | 88.79      |
| YP 001816834 Telosma mosaic virus                   | 87.93      |
| NP 734111 Dasheen mosaic virus                      | 87.93      |
| NP 734121 Bean common mosaic virus                  | 87.07      |
| YP 002321507 Zantedeschia mild mosaic virus         | 85.34      |
| YP 006401488 Pepper severe mosaic virus             | 81.03      |
| NP 734249 Potato virus Y                            | 81.03      |
| YP 009126869 Tamarillo leaf malformation virus      | 80.17      |
| YP 004934107 Keunjong mosaic virus                  | 80.17      |
| NP 734416 Peanut mottle virus                       | 80.00      |
| YP 009509106 Daphne virus Y                         | 79.31      |
| YP 009252418 Tobacco mosqueado virus                | 79.31      |
| NP 734091 Sorghum mosaic virus                      | 78.45      |
| YP 010086751 Gomphocarpus mosaic virus              | 78.45      |
| YP 611119 Daphne mosaic virus                       | 78.45      |
| YP 009351881 Sunflower ring blotch virus            | 78.45      |
| YP 001936186 Verbena virus Y                        | 78.45      |
| YP 008877631 Bidens mosaic virus                    | 78.45      |
| YP 010086860 Mashua virus Y                         | 78.45      |
| NP 734435 Pepper mottle virus                       | 78.45      |
| YP 006280739 Tomato necrotic stunt virus            | 78.45      |
| NP 787945 Peru tomato mosaic virus                  | 78.45      |
| YP 006493342 Sweet potato virus G                   | 78.45      |

| Sequence                                         | Identity % |
|--------------------------------------------------|------------|
| NP 734347 Plum pox virus                         | 78.45      |
| YP 010087797 Noni mosaic virus                   | 77.59      |
| YP 003580192 Sunflower chlorotic mottle virus    | 77.59      |
| YP 003902968 Brugmansia suaveolens mottle virus  | 77.59      |
| NP 741976 Wild potato mosaic virus               | 77.59      |
| YP 007354880 Brugmansia mosaic virus             | 77.59      |
| YP 003778216 Pepper yellow mosaic virus          | 77.59      |
| NP 734317 Sweet potato feathery mottle virus     | 77.59      |
| YP 006438196 Sweet potato virus 2                | 77.59      |
| NP 734131 Scallion mosaic virus                  | 77.59      |
| YP 022759 Yam mosaic virus                       | 77.59      |
| NP 734205 Tobacco etch virus                     | 76.72      |
| YP 009667145 Mediterranean ruda virus            | 76.72      |
| NP 734377 Potato virus V                         | 76.72      |
| YP 004046678 Sweet potato virus C                | 76.72      |
| NP 734221 Turnip mosaic virus                    | 76.72      |
| YP 009272678 Callistephus mottle virus           | 76.72      |
| YP 008719796 Pokeweed mosaic virus               | 76.72      |
| NP 734241 Papaya ringspot virus                  | 76.72      |
| YP 008992091 Zucchini tigre mosaic virus         | 76.72      |
| YP 006423981 Celery mosaic virus                 | 76.72      |
| YP 009665149 Sunflower mosaic virus              | 75.86      |
| NP 954627 Beet mosaic virus                      | 75.86      |
| YP 010087868 Begonia flower breaking virus       | 75.86      |
| YP 009272820 Barbacena virus Y                   | 75.86      |
| YP 006522440 Arracacha mottle virus              | 75.86      |
| NP 871736 Papaya leaf distortion mosaic virus    | 75.86      |
| YP 009010966 Narcissus late season yellows virus | 75.86      |
| YP 009259520 Wild onion symptomless virus        | 75.86      |
| YP 009305422 Euphorbia ringspot virus            | 75.86      |
| YP 004123962 Apium virus Y                       | 75.86      |
| YP 006395347 Pennisetum mosaic virus             | 75.00      |
| NP 734406 Johnsongrass mosaic virus              | 75.00      |
| YP 003208059 Canna yellow streak virus           | 75.00      |
| YP 331422 Shallot yellow stripe virus            | 75.00      |
| YP 009353030 Endive necrotic mosaic virus        | 75.00      |
| NP 734181 Bean yellow mosaic virus               | 75.00      |
| NP 734171 Clover yellow vein virus               | 75.00      |
| YP 009667098 Zucchini shoestring virus           | 75.00      |
| YP 001552429 Moroccan watermelon mosaic virus    | 75.00      |
| YP 009091824 Carrot thin leaf virus              | 75.00      |
| YP 009665125 Carnation vein mottle virus         | 74.78      |
| YP 010087867 Paris virus 1                       | 74.78      |
| YP 007872240 Sunflower mild mosaic virus         | 74.14      |
| YP 009256204 Pecan mosaicassociated virus        | 74.14      |
| YP 006906026 Zea mosaic virus                    | 74.14      |
| YP 006423955 Bidens mottle virus                 | 74.14      |
| YP 009666833 African eggplant mosaic virus       | 74.14      |
| YP 002308563 Narcissus yellow stripe virus       | 74.14      |
| YP 009407951 Sudan watermelon mosaic virus       | 74.14      |
| NP 734161 Lettuce mosaic virus                   | 74.14      |

| Sequence                                       | Identity % |
|------------------------------------------------|------------|
| YP 009221991 Jasmine virus T                   | 74.14      |
| NP 734101 Leek yellow stripe virus             | 74.14      |
| YP 009110712 Asparagus virus 1                 | 73.91      |
| YP 007346986 Colombian datura virus            | 73.28      |
| NP 734141 Sugarcane mosaic virus               | 73.28      |
| YP 006390065 Hippeastrum mosaic virus          | 73.28      |
| YP 001816854 Wild tomato mosaic virus          | 73.28      |
| NP 945144 Lily mottle virus                    | 73.28      |
| YP 009665152 Tulip breaking virus              | 73.28      |
| YP 001936195 Algerian watermelon mosaic virus  | 73.28      |
| YP 001718530 Banana bract mosaic virus         | 73.28      |
| NP 734231 Japanese yam mosaic virus            | 73.28      |
| NP 734151 Maize dwarf mosaic virus             | 72.41      |
| YP 007969892 Donkey orchid virus A             | 72.41      |
| YP 006390075 Cyrtanthus elatus virus A         | 72.41      |
| YP 001019196 Narcissus degeneration virus      | 72.41      |
| YP 009143308 Catharanthus mosaic virus         | 72.41      |
| YP 009466013 Hyacinth mosaic virus             | 72.41      |
| YP 009552772 Pleione flower breaking virus     | 72.41      |
| YP 006405412 Basella rugose mosaic virus       | 72.41      |
| YP 002539450 Pepper veinal mottle virus        | 72.41      |
| YP 006423993 Chilli ringspot virus             | 72.41      |
| YP 001552420 Tobacco vein banding mosaic virus | 72.41      |
| YP 009667122 Tuberose mild mottle virus        | 72.41      |
| YP 009665155 Watermelon leaf mottle virus      | 72.41      |
| YP 007697620 Sweet potato latent virus         | 72.41      |
| NP 734338 Tobacco vein mottling virus          | 72.41      |
| YP 003725727 Panax virus Y                     | 72.41      |
| YP 009091808 Vanilla distortion mosaic virus   | 71.55      |
| YP 009553508 Lily virus Y                      | 71.55      |
| YP 004123732 Lupinus mosaic virus              | 71.55      |
| NP 982308 Chilli veinal mottle virus           | 71.55      |
| YP 009388623 Cucurbit vein banding virus       | 71.55      |
| YP 009162372 Lettuce Italian necrotic virus    | 71.55      |
| YP 529498 Konjac mosaic virus                  | 71.55      |
| YP 010088117 Platycodon mild mottle virus      | 71.55      |
| YP 254722 Thunberg fritillary mosaic virus     | 71.55      |
| YP 009224125 Iris severe mosaic virus          | 70.69      |
| YP 007001282 Ornithogalum mosaic virus         | 70.69      |
| YP 010087165 Dioscorea mosaic virus            | 70.69      |
| YP 007001291 Yam mild mosaic virus             | 69.83      |
| YP 009407950 Wild melon vein banding virus     | 69.83      |
| NP 734397 Cocksfoot streak virus               | 68.97      |
| YP 009507673 Gloriosa stripe mosaic virus      | 68.97      |
| NP 871746 Onion yellow dwarf virus             | 67.24      |
| NP 734427 Pea seedborne mosaic virus           | 67.24      |
| YP 010087632 Costus stripe mosaic virus        | 67.24      |
| YP 010088127 Dendrobium chlorotic mosaic virus | 67.24      |
| YP 009667069 Iris mild mosaic virus            | 67.24      |
| NP 734327 Ryegrass mosaic virus                | 66.96      |
| YP 008320590 Habenaria mosaic virus            | 66.38      |

| Sequence                   | Identity % |
|----------------------------|------------|
| NP 734367   Potato virus A | 63.79      |
