# Supplementary material
Source: MDPI journal article supplement (https://www.mdpi.com/2077-0472/13/5/1090)
Supplement: s1 [file s1]

**Table S6.** Percent amino acid sequence identities of the complete sequence of the coat protein, between Wisteria vein mosaic virus (WVMV) isolate Bari (WAD86938.3) and 70 isolates representative of 23 species in the genus *Potyvirus*. Sequence identities are calculated based on pairwise MAFFT-based comparison. An onion yellow dwarf virus (OYDV) isolate (NP\_871747) was included in the analysis as an outgroup. The analysis was performed using Sequence Demarcation Tool (SDT) software, version 1.2. The bold line represents the species demarcation threshold within the family *Potyviridae*, according to Adams et al. [61]. All sequences are identified by their accession number, species and isolate names, country of origin. Three-letter codes are used for country names, as defined in ISO 3166-1 standard [62]. Detailed information on individual isolates can be found in Table S2.

| Sequence                                                 | Identity % |
|----------------------------------------------------------|------------|
| AXR98215 Wisteria vein mosaic virus ThW2259 IRN          | 100.00     |
| QLK02401 Wisteria vein mosaic virus Ir IRN               | 100.00     |
| AAN76998 Wisteria vein mosaic virus AUS AUS              | 99.65      |
| YP_842359 Wisteria vein mosaic virus Beijing CHN         | 96.81      |
| AAS89818 Wisteria vein mosaic virus BJ CHN               | 96.81      |
| QBK46786 Wisteria vein mosaic virus YZ CHN               | 96.75      |
| BDC30334 Soybean mosaic virus CC196 KOR                  | 81.89      |
| BDS00297 Wisteria vein mosaic virus CeJH KOR             | 81.56      |
| NP_734200 Soybean mosaic virus N USA                     | 81.51      |
| UYV39659 Soybean mosaic virus ZJNB CHN                   | 81.51      |
| UQB67141 Soybean mosaic virus Mashhad IRN                | 81.51      |
| BBJ70068 Uraria mosaic virus OC JPN                      | 80.73      |
| ABO16408 Calla lily latent virus BM19 TWN                | 80.50      |
| ABO16407 Calla lily latent virus E49 TWN                 | 80.50      |
| QLG97050 Wisteria vein mosaic virus JEBUp KOR            | 80.14      |
| ABO16404 Calla lily latent virus m10 TWN                 | 80.14      |
| ABO16409 Calla lily latent virus 3c27 TWN                | 79.79      |
| UUW33094 Yambean mosaic virus BR6 BRA                    | 78.68      |
| YP_077277 Watermelon mosaic virus WMVFr FRA              | 78.65      |
| UQZ09652 Watermelon mosaic virus CSG USA                 | 78.65      |
| WBQ21405 Watermelon mosaic virus 21MM ESP                | 78.29      |
| YP_004940328 Yambean mosaic virus SR PER                 | 77.82      |
| QIN87091 Watermelon mosaic virus CNwm1 KOR               | 77.58      |
| YP_004564598 Hardenbergia mosaic virus HarMV57.2 AUS     | 77.29      |
| ASU91626 Bean common mosaic virus IrGoB IRN              | 75.89      |
| YP_009667131 Paris mosaic necrosis virus PMNVcn CHN      | 75.84      |
| UJE38535 Paris mosaic necrosis virus PMNVPolygonatum CHN | 75.84      |
| NP_734122 Bean common mosaic virus R CHN                 | 75.80      |
| BDF92389 Bean common mosaic virus Riukiensis111 JPN      | 75.53      |
| ADZ45575 Hardenbergia mosaic virus MUH1 AUS              | 74.91      |
| ADZ45577 Hardenbergia mosaic virus MU4 AUS               | 74.91      |
| YP_009255234 Impatiens flower break virus Asan KOR       | 74.82      |
| UXC97432 Bean common mosaic virus BK5 IND                | 74.73      |
| YP_007001303 Blue squill virus A SW3 AUS                 | 74.55      |
| UZS00537 Paris mosaic necrosis virus ZY CHN              | 74.17      |
| ADZ45576 Hardenbergia mosaic virus Pem1 AUS              | 73.82      |
| QPJ58776 Telosma mosaic virus TelMVGL2 VNM               | 73.16      |
| QHR83187 Telosma mosaic virus Wuyishan CHN               | 73.16      |
| QHR83186 Telosma mosaic virus Fuzhou CHN                 | 73.16      |
| YP_004063680 Passion fruit woodiness virus PWVMU2 AUS    | 72.66      |
| BAN10294 Passion fruit woodiness virus Gld1 AUS          | 72.66      |

| Sequence                                              | Identity % |
|-------------------------------------------------------|------------|
| UXM20226 East Asian Passiflora virus FJ CHN           | 72.66      |
| QUP51979 Passiflora chlorosis virus Rehovot ISR       | 72.43      |
| ART66970 Passion fruit woodiness virus SW8 AUS        | 72.20      |
| YP 009458617 Saffron latent virus IrKh1 IRN           | 72.06      |
| QPJ58619 East Asian Passiflora virus EAPVGL1 VNM      | 71.99      |
| YP 001974445 Fritillary virus Y Panan CHN             | 71.90      |
| YP 001816835 Telosma mosaic virus Hanoi VNM           | 71.69      |
| YP 006395361 East Asian Passiflora virus AO JPN       | 71.28      |
| NP 734112 Dasheen mosaic virus M13 CHN                | 71.22      |
| QBI77031.2 Dasheen mosaic virus Et5 ETH               | 70.86      |
| AZF86246 Passiflora mottle virus DakNong VNM          | 70.59      |
| BDQ13836 Dasheen mosaic virus K1 KOR                  | 70.50      |
| BBI93213.2 Passiflora foetida virus Y OC JPN          | 70.22      |
| QPJ58777 Passiflora mottle virus DN4 VNM              | 70.22      |
| QPJ58778 Passiflora mottle virus NA1 VNM              | 70.22      |
| URC17600 East Asian Passiflora virus Yecheon KOR      | 70.21      |
| AIZ48756 Cowpea aphidborne mosaic virus RR3 IND       | 69.82      |
| QFP41183 Cowpea aphidborne mosaic virus Para BRA      | 69.45      |
| AXY96728 Cowpea aphidborne mosaic virus 11K KEN       | 69.45      |
| UJH40707 Zucchini yellow mosaic virus SG CHN          | 69.23      |
| YP 009665140 Passiflora chlorosis virus Florida USA   | 69.15      |
| WBG54264 Zucchini yellow mosaic virus DSMZ PV0466 DEU | 68.82      |
| QWL14830 Zucchini yellow mosaic virus ZYMVIq IRQ      | 68.82      |
| NP 734192 Zucchini yellow mosaic virus TWTN3 TWN      | 68.46      |
| UUL70678 Dasheen mosaic virus PNGK PNG                | 68.44      |
| NP 734388 Cowpea aphidborne mosaic virus CABMVZ ZWE   | 68.00      |
| YP 002321508 Zantedeschia mild mosaic virus TW TWN    | 63.83      |
| ALX38286 Zantedeschia mild mosaic virus AUS AUS       | 62.41      |
| NP 871747 Onion yellow dwarf virus Yuhang CHN         | 60.94      |
